# Supplementary material for: Association of a composite score of relative grip strength and timed up and go test with incident type 2 diabetes mellitus: Guangzhou Biobank Cohort Study
Source: publisher site journal article supplement (doi:10.18632/aging.203285), 2021-07-16
Supplement: Supplementary file [file aging-v13i14-203285-supplementary-material-SD1.pdf]

**SUPPLEMENTARY FIGURES**

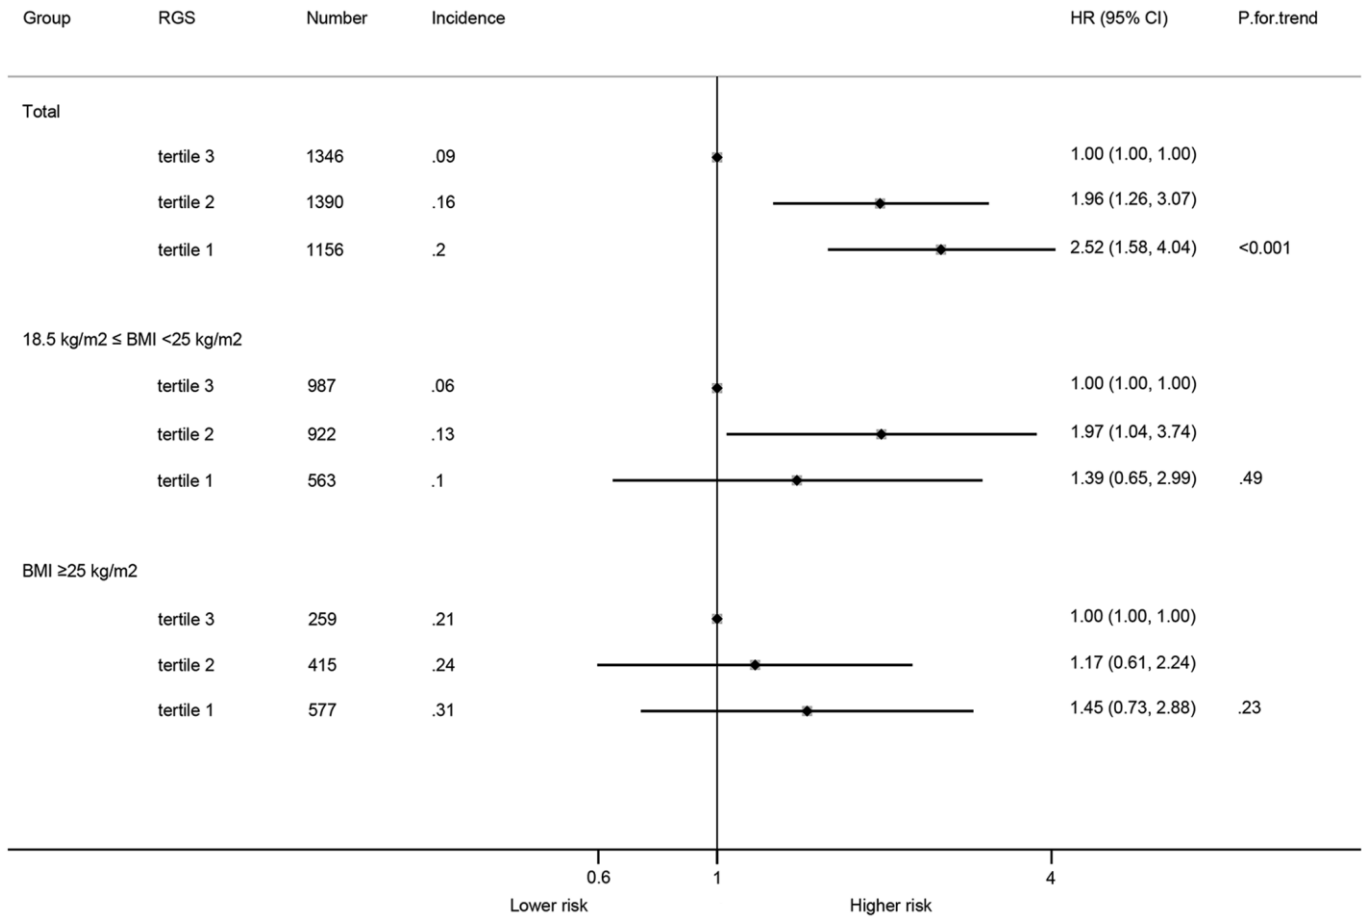

**Supplementary Figure 1. Associations between RGS and incident type 2 diabetes mellitus.** The HRs and 95% CIs above were adjusted for sex, age, education, occupation, smoking status, alcohol use and self-rated health. Abbreviations: RGS: relative grip strength; Number: number of participants; Incidence: Incidence of T2DM per 100 person-year.

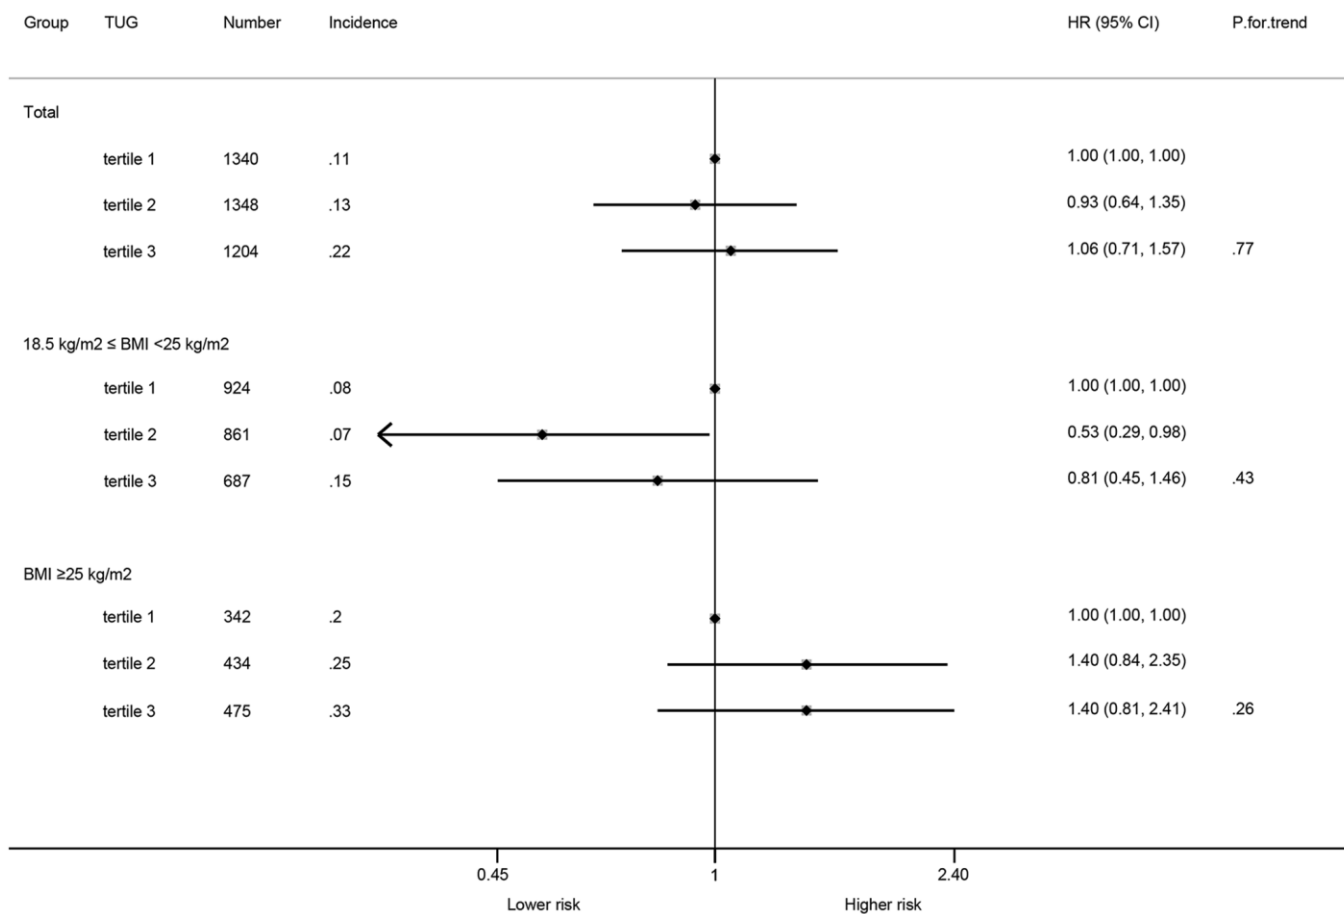

**Supplementary Figure 2. Associations between TUG test and incident type 2 diabetes mellitus.** The HRs and 95% CIs above were adjusted for sex, age, education, occupation, alcohol use, self-rated health and body mass index. Abbreviations: TUG test: timed up and go test; Number: number of participants; Incidence: Incidence of T2DM per 100 person-year.
