# Supplementary material for: Association of a composite score of relative grip strength and timed up and go test with incident type 2 diabetes mellitus: Guangzhou Biobank Cohort Study
Source: publisher site journal article supplement (doi:10.18632/aging.203285), 2021-07-16
Supplement: Supplementary file [file aging-v13i14-203285-supplementary-material-SD2.pdf]

## SUPPLEMENTARY TABLES

**Supplementary Table 1. Regression coefficients ( $\beta$ s and 95% confidence intervals) for glycemic indicators at follow-up by baseline groups of relative grip strength and timed up and go test in participants without baseline type 2 diabetes mellitus.**

|                                                                          | Fasting glucose, mmol/l |                             | 2-hour post-load glucose, mmol/l |                             | Hemoglobin A <sub>1c</sub> , % |                             |
|--------------------------------------------------------------------------|-------------------------|-----------------------------|----------------------------------|-----------------------------|--------------------------------|-----------------------------|
|                                                                          | Crude model             | Adjusted model <sup>†</sup> | Crude model                      | Adjusted model <sup>†</sup> | Crude model                    | Adjusted model <sup>†</sup> |
| <b>Tertiles of relative grip strength (RGS), kg per kg/m<sup>2</sup></b> |                         |                             |                                  |                             |                                |                             |
| 3rd ( <i>n</i> = 1,346)                                                  | 0.00                    | 0.00                        | 0.00                             | 0.00                        | 0.00                           | 0.00                        |
| 2nd ( <i>n</i> = 1,390)                                                  | 0.07 (0.002, 0.13)*     | 0.03 (-0.05, 0.11)          | 0.46 (0.27, 1.07)***             | 0.33 (0.09, 0.56)**         | 0.07 (0.02, 0.12)**            | 0.04 (-0.02, 0.11)          |
| 1st ( <i>n</i> = 1,156)                                                  | 0.15 (0.08, 0.21)***    | 0.03 (0.002, 0.18)*         | 0.88 (0.68, 1.07)***             | 0.59 (0.34, 0.85)***        | 0.13 (0.07, 0.18)***           | 0.09 (0.02, 0.16)*          |
| <i>P</i> for trend                                                       | <0.001                  | 0.04                        | <0.001                           | <0.001                      | <0.001                         | 0.02                        |
| <b>Tertiles of timed up and go (TUG) test, second</b>                    |                         |                             |                                  |                             |                                |                             |
| 1st ( <i>n</i> = 1,340)                                                  | 0.00                    | 0.00                        | 0.00                             | 0.00                        | 0.00                           | 0.00                        |
| 2nd ( <i>n</i> = 1,348)                                                  | 0.07 (0.01, 0.14)*      | 0.04 (-0.03, 0.11)          | 0.16 (-0.03, 0.35)               | 0.01 (-0.19, 0.21)          | 0.04 (-0.01, 0.09)             | 0.01 (-0.05, 0.06)          |
| 3rd ( <i>n</i> = 1,204)                                                  | 0.12 (0.05, 0.18)**     | 0.05 (-0.03, 0.13)          | 0.73 (0.54, 0.93)***             | 0.23 (-0.0001, 0.45)        | 0.09 (0.04, 0.15)**            | 0.01 (-0.06, 0.07)          |
| <i>P</i> for trend                                                       | 0.001                   | 0.18                        | <0.001                           | 0.06                        | 0.001                          | 0.79                        |

<sup>†</sup>Adjusting for sex, age, education, occupation, smoking status (only for analysis of RGS), alcohol use, self-rated health, body mass index (only for analysis of TUG), and fasting glucose at baseline, as appropriate.

\**P* < 0.05; \*\**P* < 0.01; \*\*\**P* < 0.001.

**Supplementary Table 2. Crude and adjusted hazards ratios (95% confidence intervals) for incident type 2 diabetes mellitus (T2DM) during the follow-up from March 2008 to December 2012 by baseline groups of relative grip strength and timed up and go test.**

|                                                                          | Number | Incidence of T2DM per 100 person-year | Crude model          | Adjusted model <sup>†</sup> |
|--------------------------------------------------------------------------|--------|---------------------------------------|----------------------|-----------------------------|
| <b>Tertiles of relative grip strength (RGS), kg per kg/m<sup>2</sup></b> |        |                                       |                      |                             |
|                                                                          |        |                                       | <b>Total</b>         |                             |
| 3rd                                                                      | 1,346  | 0.09                                  | 0.00                 | 0.00                        |
| 2nd                                                                      | 1,390  | 0.16                                  | 1.77 (1.26, 2.49)**  | 1.96 (1.26, 3.07)**         |
| 1st                                                                      | 1,156  | 0.20                                  | 2.26 (1.61, 3.17)*** | 2.52 (1.58, 4.04)***        |
| <i>P</i> for trend                                                       |        |                                       | <0.001               | <0.001                      |
| <b>Normal weight</b>                                                     |        |                                       |                      |                             |
| 3rd                                                                      | 987    | 0.06                                  | 0.00                 | 0.00                        |
| 2nd                                                                      | 922    | 0.13                                  | 2.01 (1.26, 3.21)**  | 1.97 (1.04, 3.74)*          |
| 1st                                                                      | 563    | 0.10                                  | 1.57 (0.91, 2.72)    | 1.39 (0.65, 2.99)           |
| <i>P</i> for trend                                                       |        |                                       | 0.06                 | 0.49                        |
| <b>Overweight/obesity</b>                                                |        |                                       |                      |                             |
| 3rd                                                                      | 259    | 0.21                                  | 0.00                 | 0.00                        |
| 2nd                                                                      | 415    | 0.24                                  | 1.17 (0.69, 1.96)    | 1.17 (0.61, 2.24)           |
| 1st                                                                      | 577    | 0.31                                  | 1.51 (0.94, 2.43)    | 1.45 (0.73, 2.88)           |
| <i>P</i> for trend                                                       |        |                                       | 0.06                 | 0.23                        |
| <b>Tertiles of timed up and go (TUG) test, second</b>                    |        |                                       |                      |                             |
| 1st                                                                      | 1,340  | 0.11                                  | 0.00                 | 0.00                        |
| 2nd                                                                      | 1,348  | 0.13                                  | 1.18 (0.84, 1.67)    | 0.93 (0.64, 1.35)           |
| 3rd                                                                      | 1,204  | 0.22                                  | 2.07 (1.51, 2.83)*** | 1.06 (0.71, 1.57)           |
| <i>P</i> for trend                                                       |        |                                       | <0.001               | 0.77                        |

Incident T2DM: defined by a history of self-reported physician-diagnosed diabetes or glucose-lowering treatment during follow up or fasting glucose  $\geq 7.0$  mmol/l or 2hPG  $\geq 11.1$  mmol/l and without T2DM at baseline; Normal weight:  $18.5 \text{ kg/m}^2 \leq \text{BMI} < 25 \text{ kg/m}^2$ ; Overweight/obesity:  $\text{BMI} \geq 25 \text{ kg/m}^2$ .

<sup>†</sup>Adjusting for sex, age, education, occupation, smoking status (only for analysis of RGS), alcohol use, self-rated health and body mass index (only for analysis of TUG).

\*\* $P < 0.01$ ; \*\*\* $P < 0.001$ .

**Supplementary Table 3. Comparisons of the Cox proportional hazards regression models for incident diabetes using the RGS-TUG score, relative grip strength (RGS) and timed up and go (TUG) test, separately.**

|                   | RGS-TUG score     | RGS               | TUG test          |
|-------------------|-------------------|-------------------|-------------------|
| C-index (95% CI)  | 0.60 (0.56, 0.64) | 0.58 (0.54, 0.61) | 0.56 (0.53, 0.58) |
| CPE (95% CI)      | 0.61 (0.58, 0.64) | 0.59 (0.55, 0.62) | 0.58 (0.54, 0.61) |
| AUC (95% CI)      | 0.61 (0.58, 0.65) | 0.58 (0.55, 0.62) | 0.58 (0.55, 0.61) |
| AIC               | 3982.21           | 3994.56           | 6169.54           |
| -2 Log likelihood | 3980.21           | 3990.56           | 6165.54           |

Abbreviations: CI: confidence interval; C-index: Harrell's concordance index; CPE: Gönen and Heller's Concordance Probability Estimate; AUC: Area Under Curve; AIC: Akaike Information Criterion.
